# Supplementary material for: Iron(ii) tetrafluoroborate complexes of new tetradentate C-scorpionates as catalysts for the oxidative cleavage oftrans-stilbene with H2O2
Source: Royal Society of Chemistry journal article supplement (doi:10.1039/c9dt02829c), 2019-01-01
Supplement: c9dt02829c1.pdf [file c9dt02829c1.pdf]

Supporting Information for :

**Iron(II) Tetrafluoroborate Complexes of New Tetradentate C-Scorpionates as Catalysts for the Oxidative Cleavage of *trans*-Stilbene with H<sub>2</sub>O<sub>2</sub>**

Denan Wang<sup>a</sup>, James R. Gardinier<sup>a\*</sup> and Sergey V. Lindeman<sup>a</sup>

Department of Chemistry, Marquette University, 1414 W. Clybourn St., Milwaukee, WI 53233.

Table of Contents

|                                                                                                                |     |
|----------------------------------------------------------------------------------------------------------------|-----|
| S1. NMR spectra of intermediate and ligands <b>L</b> and <b>L*</b> .....                                       | S2  |
| S2. NMR spectra of iron complexes <b>1</b> and <b>2</b> .....                                                  | S8  |
| S3. Evans data and plot .....                                                                                  | S9  |
| S4. Electronic spectra .....                                                                                   | S10 |
| S5. Results of 4 hr photocatalysis experiments .....                                                           | S11 |
| S6. Time course of photocatalytic experiments catalyzed by RFT and <b>1</b> (purple) or <b>2</b> (green) ..... | S12 |
| S7. Stability test for <b>1</b> and <b>2</b> under conditions of photocatalysis. ....                          | S13 |

S1. NMR spectra of intermediate and ligands L and L\*

Figure S1. (a)  $^1\text{H-NMR}$  of P1a in  $\text{CDCl}_3$  at 22 °C

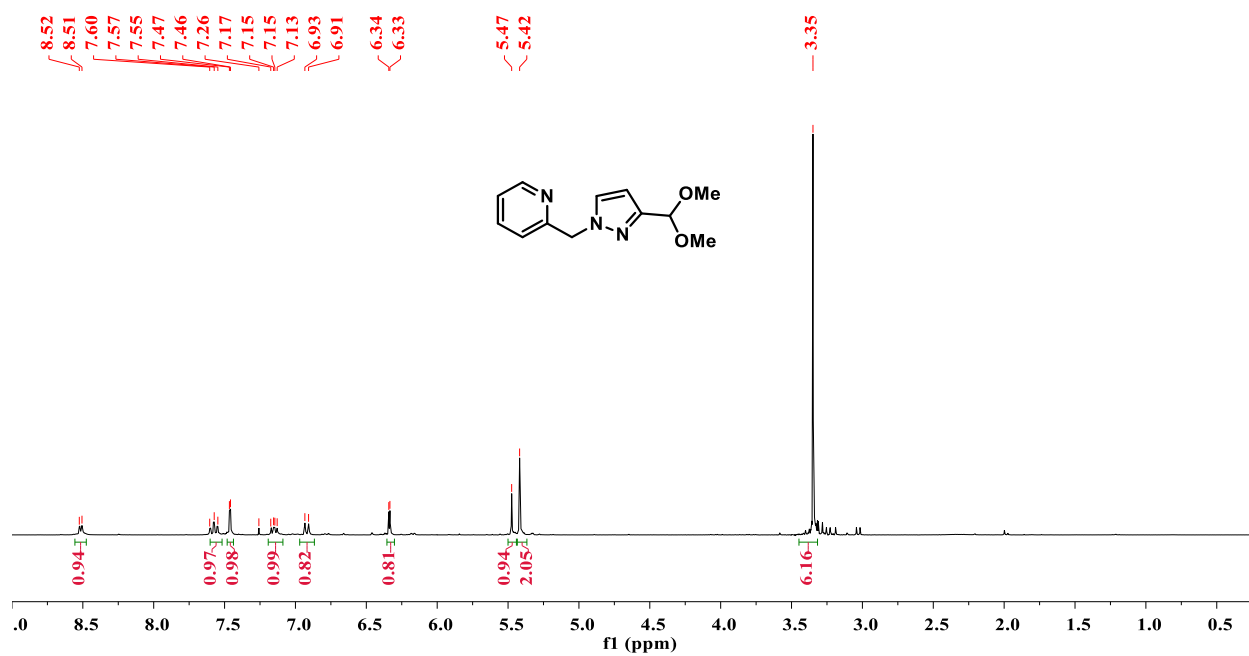

Figure S1. (b)  $^{13}\text{C-NMR}$  of P1a in  $\text{CDCl}_3$  at 22 °C

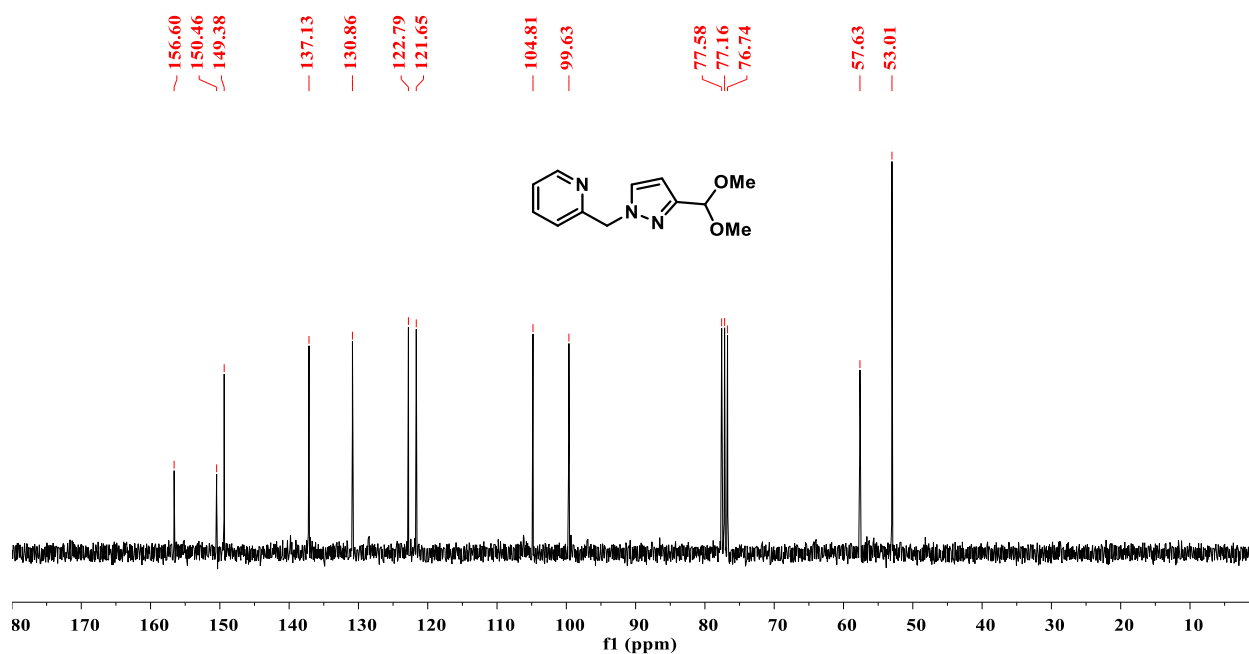

**Figure S1.** (c)  $^1\text{H}$ -NMR spectrum of a mixture of P1a and P1b (bottom, maroon spectrum) with resonances for minor component of P1b highlighted by arrows compared to spectrum of pure P1a (top, aqua).

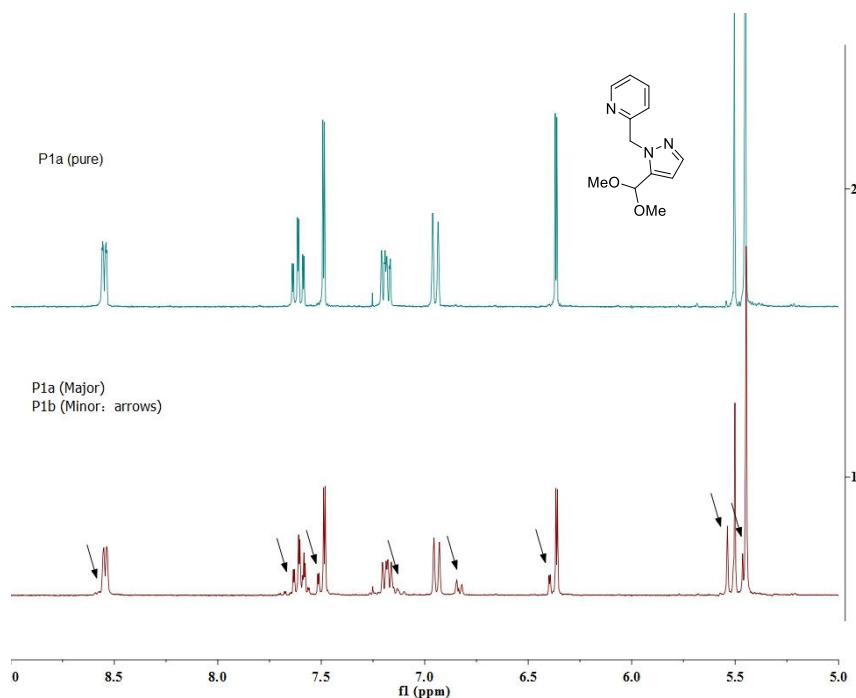

Note: Due to the similarity in solubility (and  $R_f$  values) of P1b with both P1a and P2a, it has not yet been possible to isolate pure P1b. As stated in the main text, the mixtures of P1b and P1a are sufficient for either conversion to P2a or for use to make the ligands.

**Figure S1.** (d)  $^{13}\text{C}$ -NMR spectrum of a mixture of P1b (major) and P2a (minor) in  $\text{CDCl}_3$  at 22 °C compared to that of pure P2a, bottom)

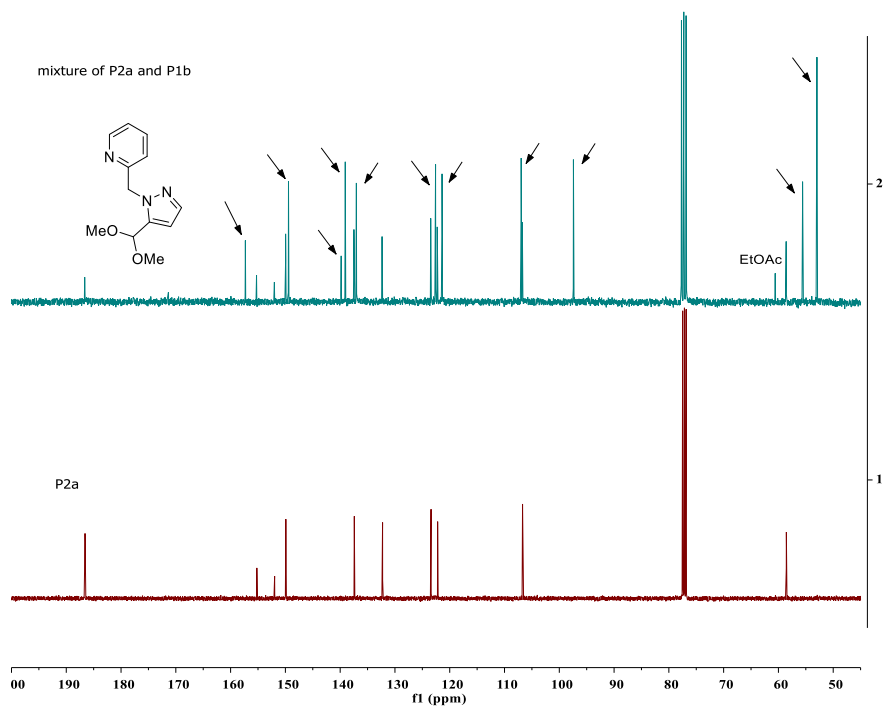

Figure S1. (e)  $^1\text{H-NMR}$  of P2a in  $\text{CDCl}_3$  at 22  $^\circ\text{C}$

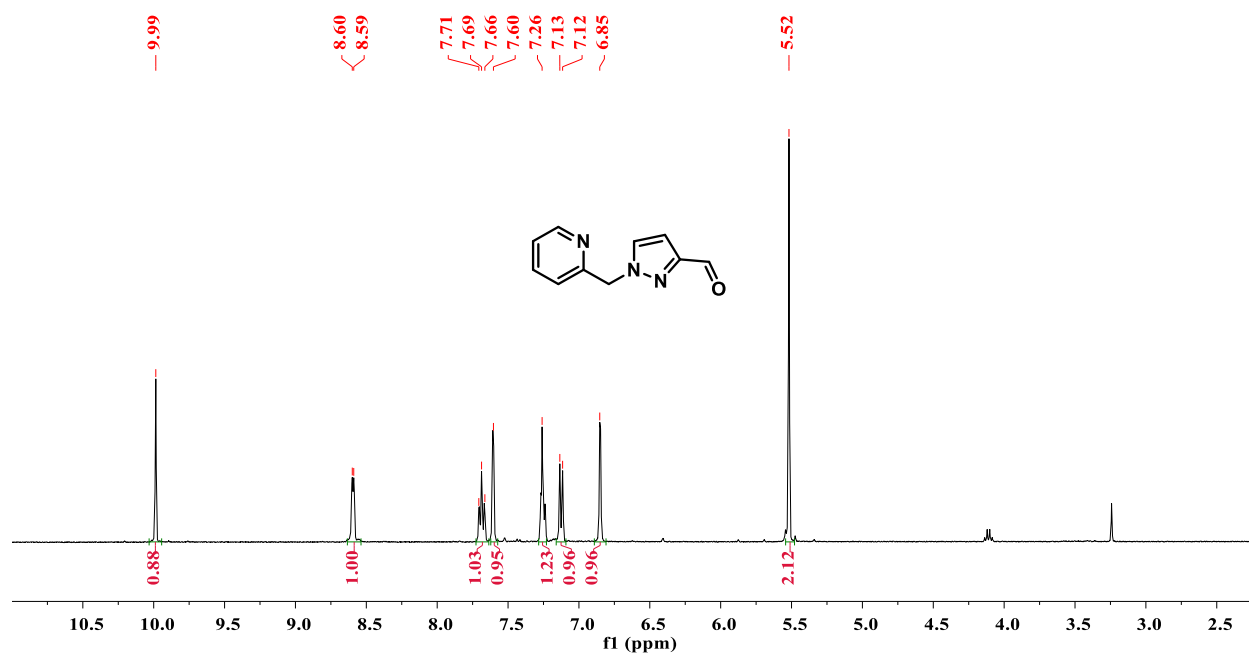

Figure S1. (f)  $^{13}\text{C-NMR}$  of P2a in  $\text{CDCl}_3$  at 22  $^\circ\text{C}$

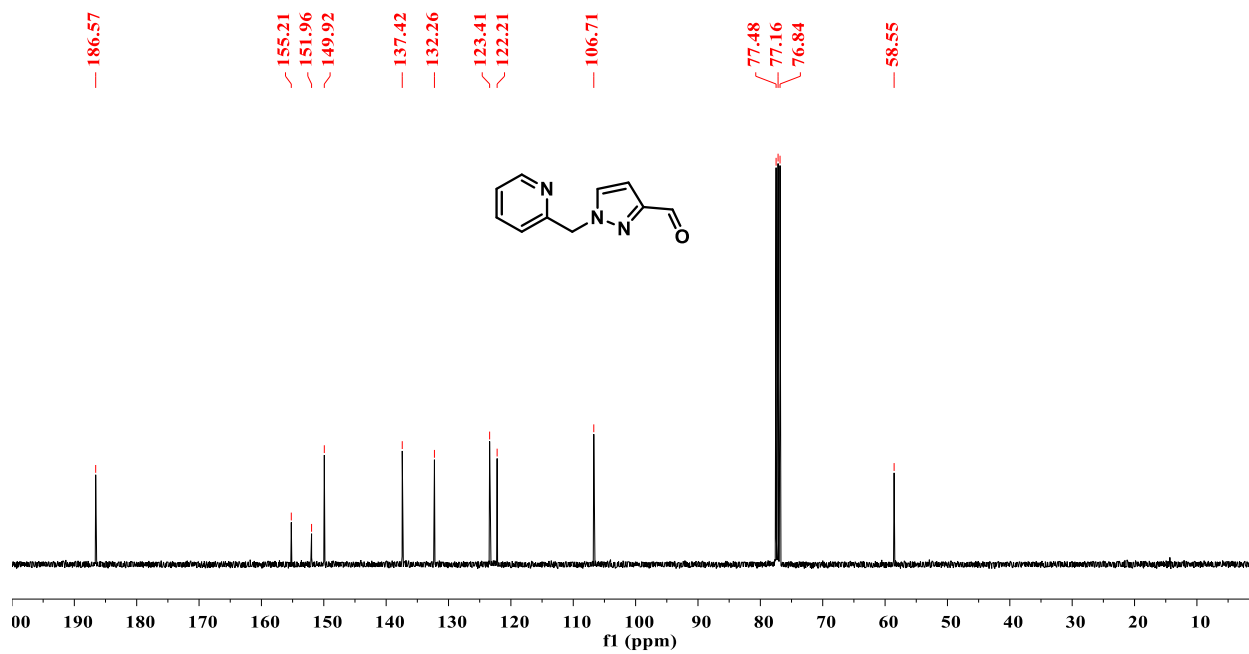

Figure S1. (g)  $^1\text{H-NMR}$  of P2b in  $\text{CDCl}_3$  at 22 °C

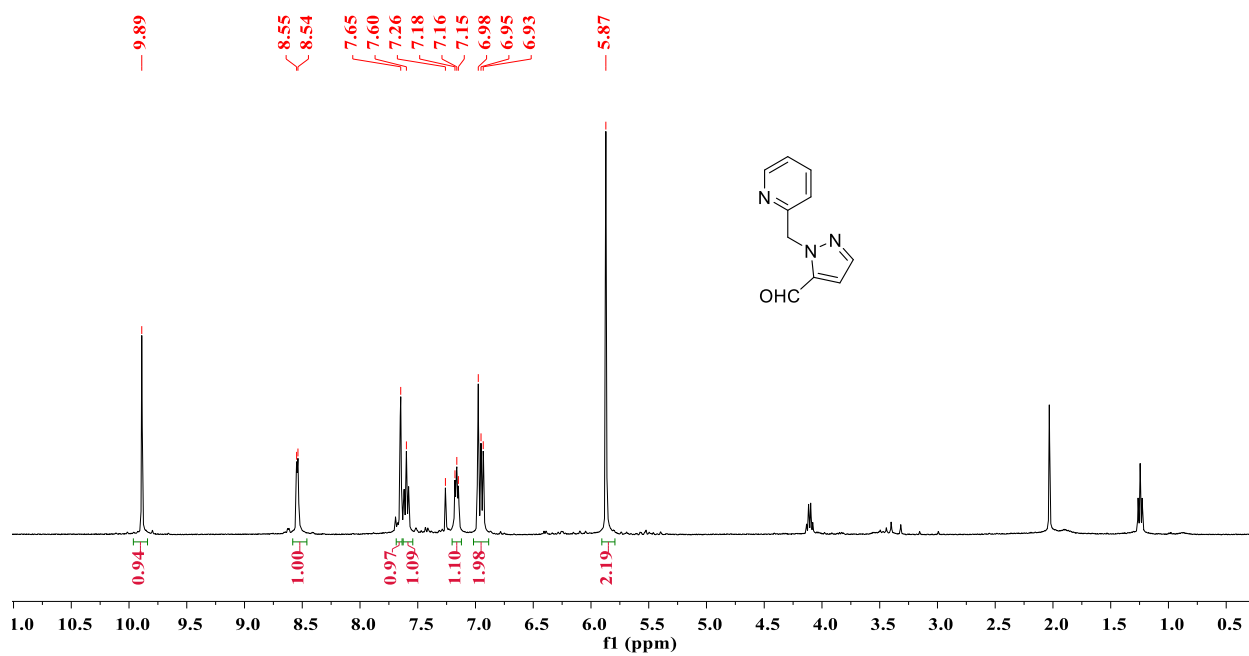

Figure S1. (h)  $^{13}\text{C-NMR}$  of P2b in  $\text{CDCl}_3$  at 22 °C

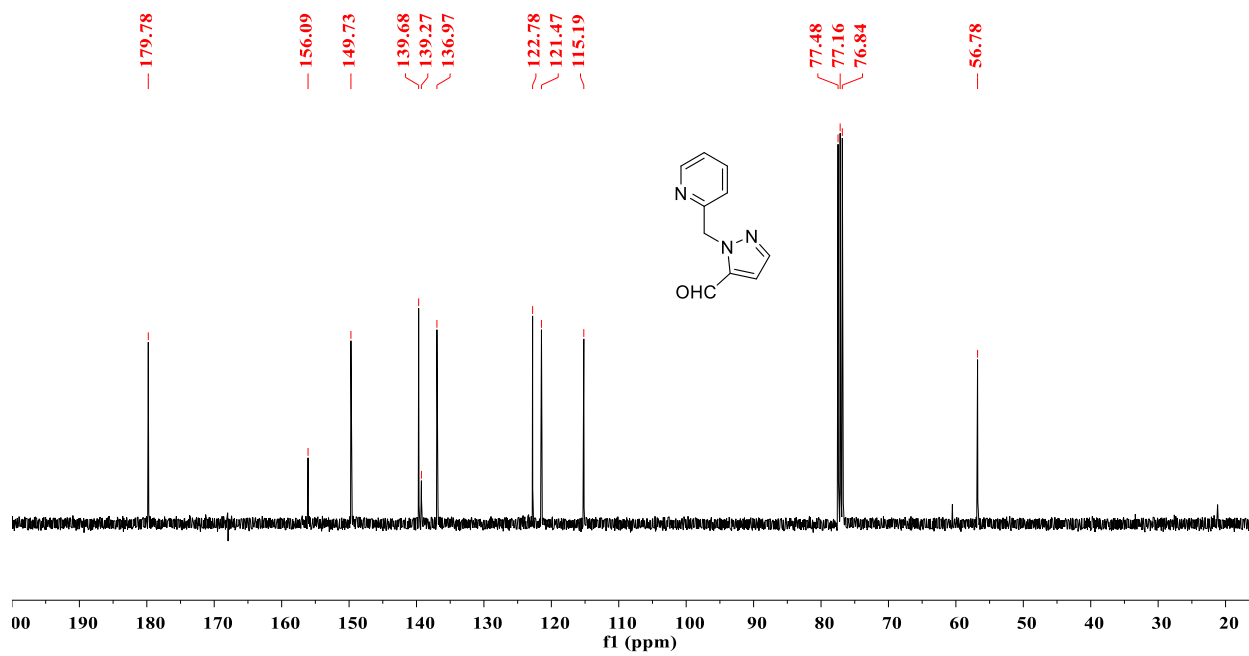

Figure S1. (i)  $^1\text{H-NMR}$  of ligand L in  $\text{CDCl}_3$  at 22  $^\circ\text{C}$

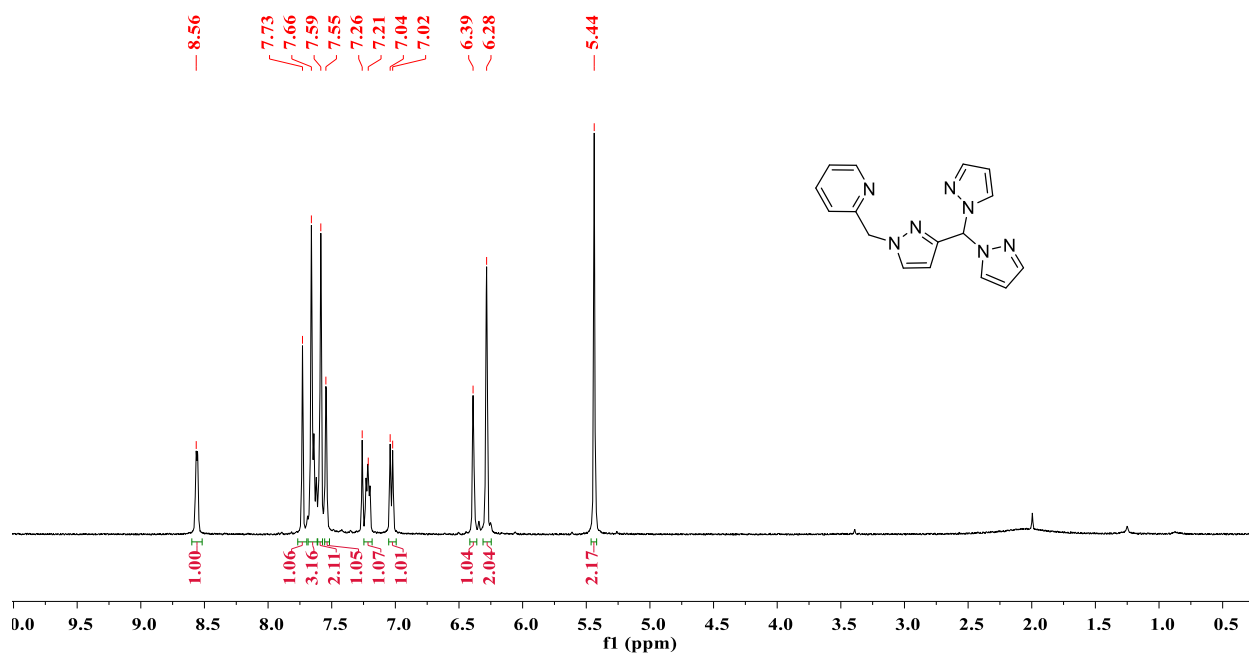

Figure S1. (j)  $^{13}\text{C-NMR}$  of ligand L in  $\text{CDCl}_3$  at 22  $^\circ\text{C}$

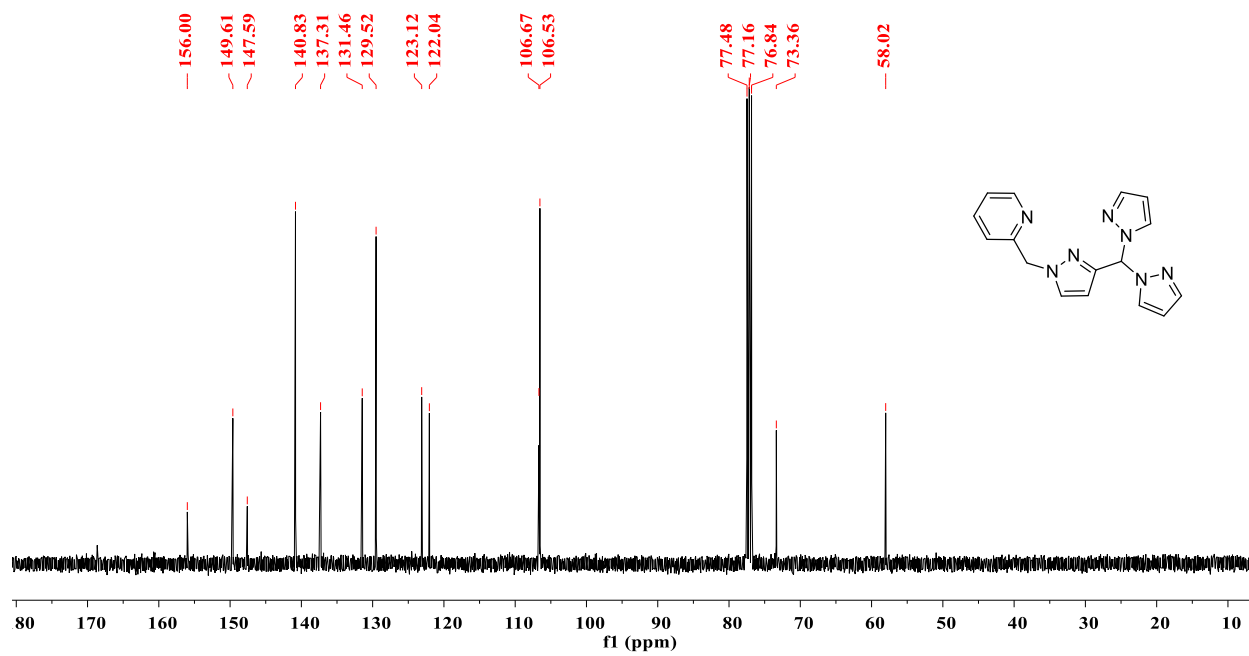

Figure S1. (k)  $^1\text{H-NMR}$  of ligand  $\text{L}^*$  in  $\text{CDCl}_3$  at  $22^\circ\text{C}$

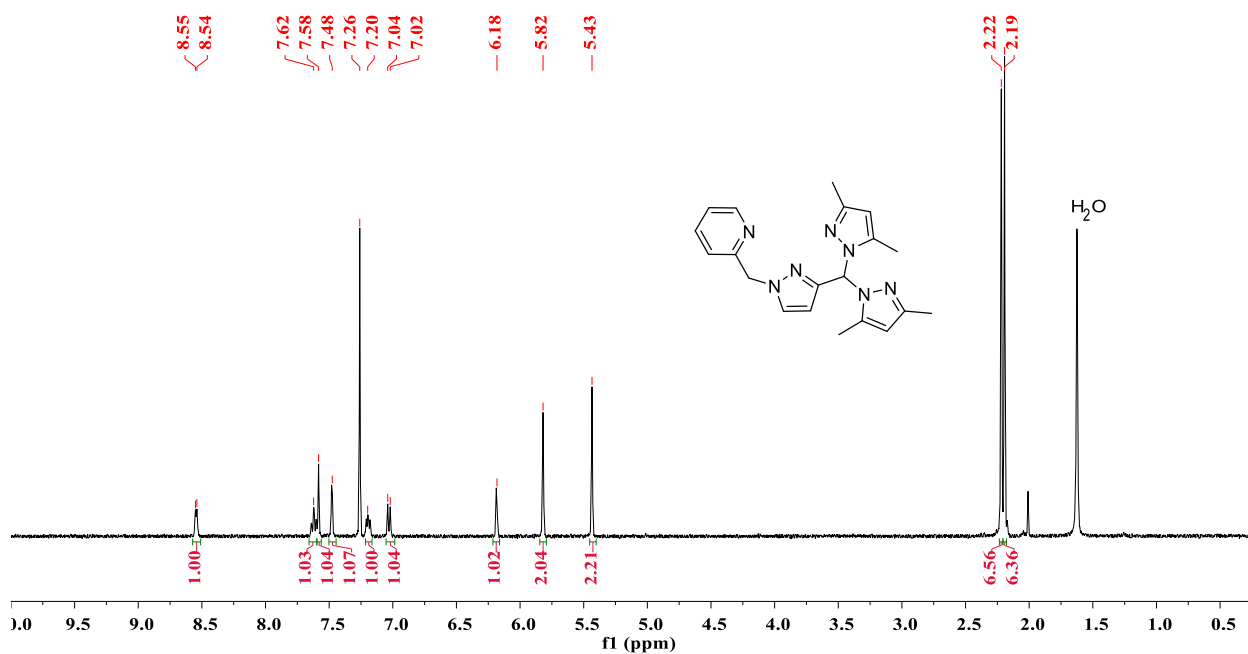

Figure S1. (l)  $^{13}\text{C-NMR}$  of ligand  $\text{L}^*$  in  $\text{CDCl}_3$  at  $22^\circ\text{C}$

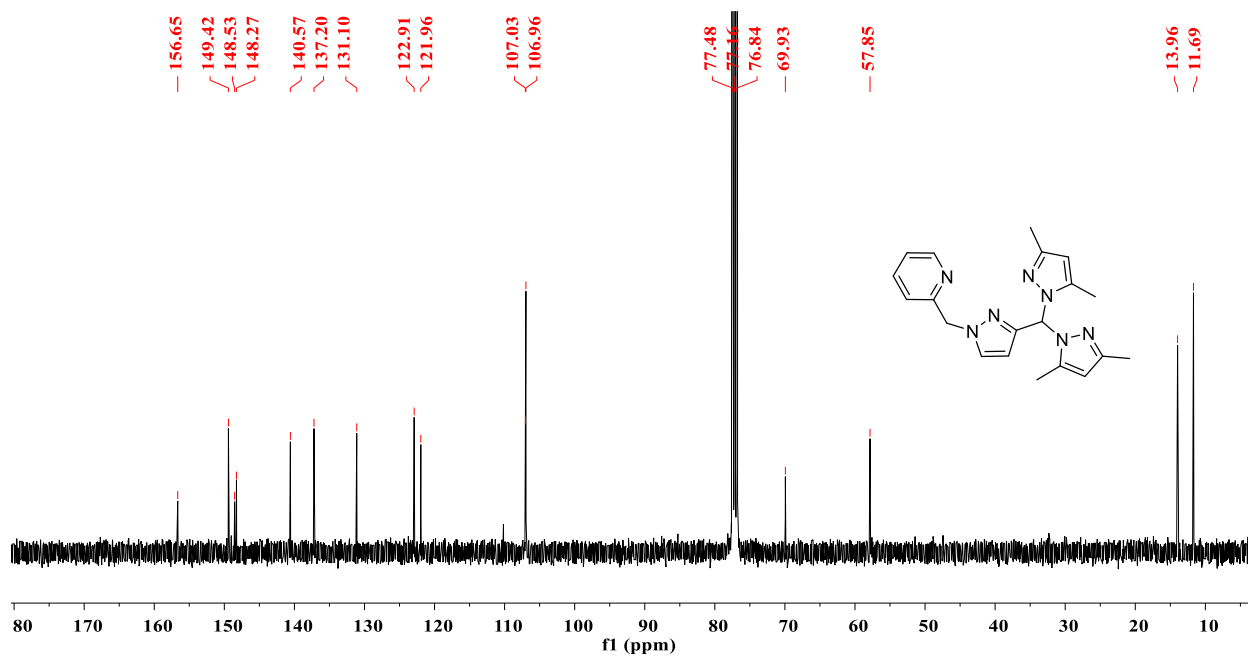

S2. NMR spectra of iron complexes **1** and **2**.

**Figure S2.** (a)  $^1\text{H-NMR}$  of complex **1** in  $\text{CD}_3\text{CN}$  at  $22^\circ\text{C}$

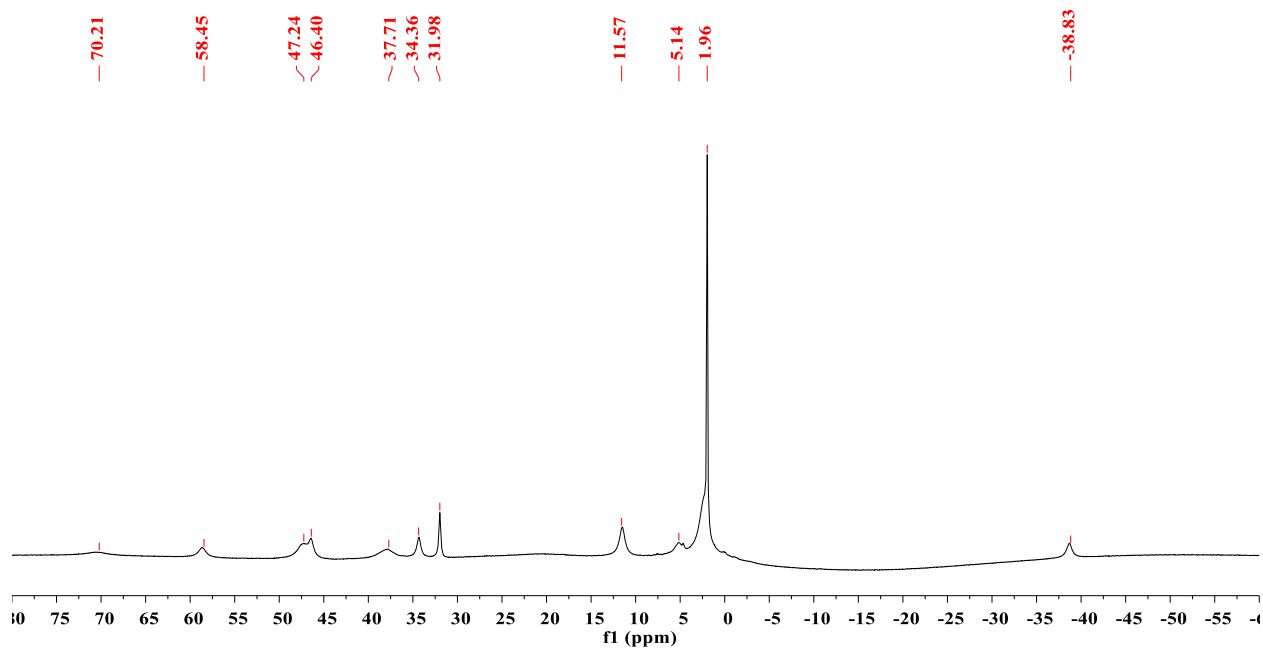

**Figure S2.** (b)  $^1\text{H-NMR}$  of complex **2** in  $\text{CD}_3\text{CN}$  at  $22^\circ\text{C}$

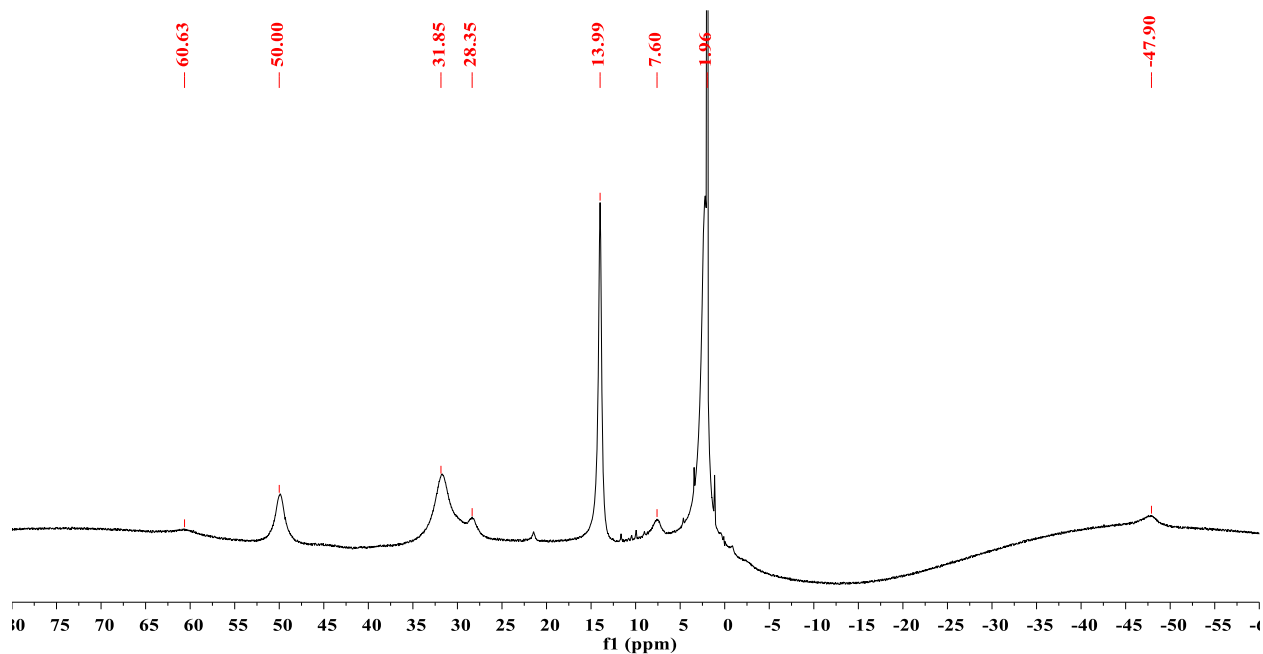



S3. Evans data and plot

**Figure S3.** (a) Top: Variable temperature  $^1\text{H-NMR}$  of complex **1** (Evans method) in  $\text{CD}_3\text{CN}$  at range from 22 to  $-30\text{ }^\circ\text{C}$ . (b) bottom: Plot of the relationship between  $\mu_B$  and temperature.

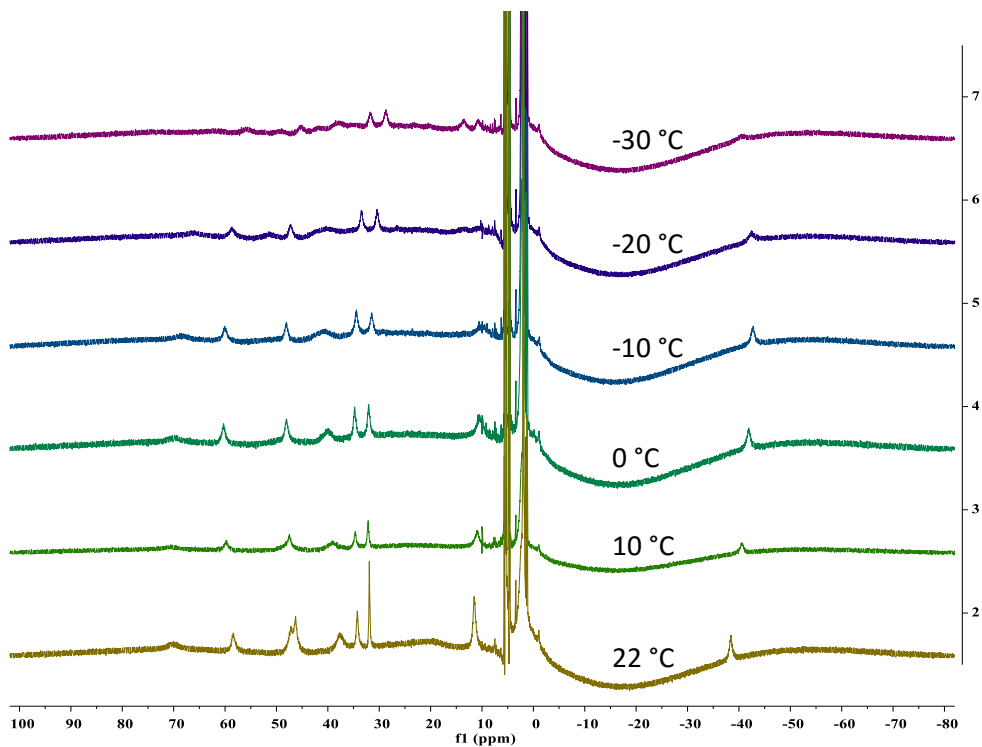

(a)

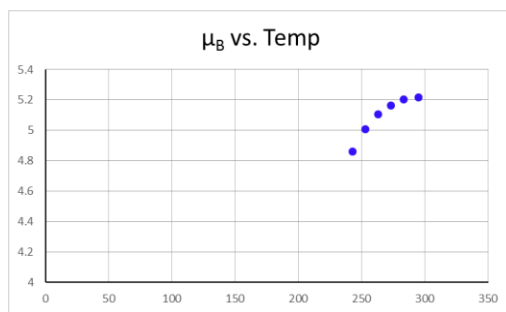

(b)

**Table S1.** Values of  $\mu_B$  for **1** in  $\text{CH}_3\text{CN}$  at different temperature

| Temp | $\mu_B$ |
|------|---------|
| 295  | 5.216   |
| 283  | 5.206   |
| 273  | 5.162   |
| 263  | 5.104   |
| 253  | 5.006   |
| 243  | 4.86    |

S4. Electronic spectra

**Figure S4.** Overlay of electronic spectra of **1** and **2** in CH<sub>3</sub>CN (a) at room temperature and (b) the spectra of **1** at temperatures between 238 and 313 K.

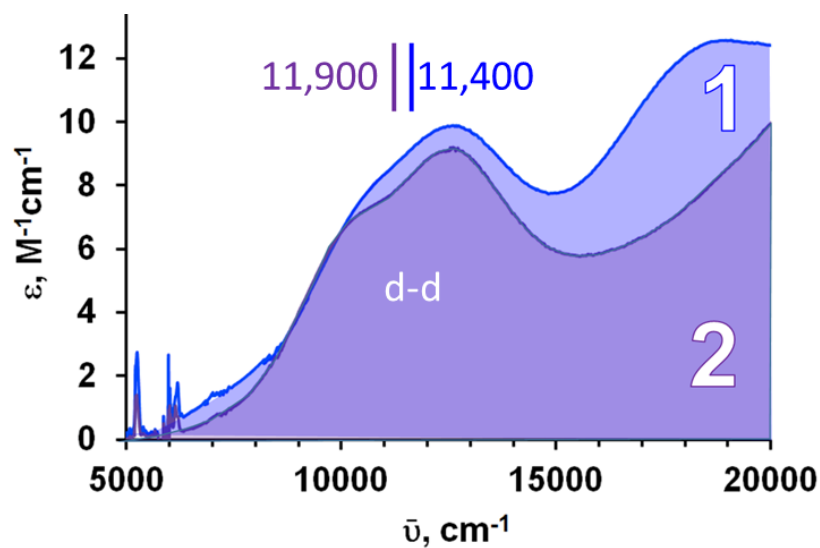

(a)

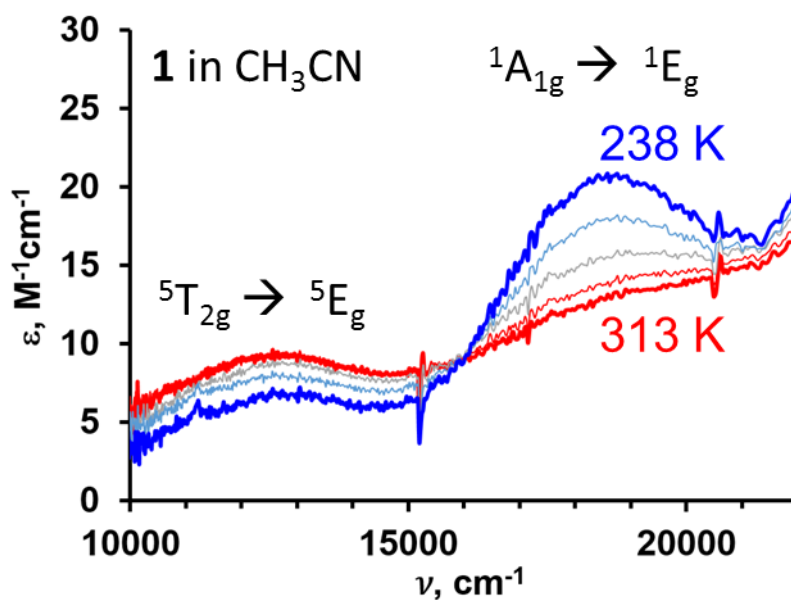

(b)

S5. Results of 4 hr photocatalysis experiments

**Table S2.** Summary of data from photocatalytic experiments<sup>a</sup> performed under same conditions as Table 3 of main text, but for 4h rather than 1.5 hr.

| entry | [Fe] catalyst <sup>b</sup>                                                 | product <sup>c</sup> |    |   |   |   |   | % <sup>d</sup> |
|-------|----------------------------------------------------------------------------|----------------------|----|---|---|---|---|----------------|
|       |                                                                            | a                    | b  | c | d | e | f |                |
| 1     | <b>1</b>                                                                   | 83                   | 4  | 5 | 3 | 1 | 2 | 98             |
| 2     | <b>2</b>                                                                   | 76                   | 4  | 6 | 5 | 1 | 5 | 97             |
| 3     | [Fe(tpa)(CH <sub>3</sub> CN) <sub>2</sub> ](BF <sub>4</sub> ) <sub>2</sub> | 77                   | 10 | 4 | 5 | 1 | 2 | 99             |
| 4     | [Fe(H <sub>2</sub> O) <sub>6</sub> ](BF <sub>4</sub> ) <sub>2</sub>        | 38                   | 30 | 1 | 1 | 1 | 9 | 80             |
| 5     | none                                                                       | 26                   | 1  | 0 | 0 | 0 | 0 | 27             |

<sup>a</sup>. 0.04 mmol *trans*- stilbene, 0.0032 mmol, 8 mol% RFT, 3 mL 9:1 CH<sub>3</sub>CN:H<sub>2</sub>O, 30°C, 440-450 nm 12W, 4h.

<sup>b</sup>. 0.0040 mmol 10 mol%. <sup>c</sup>. labelling as per Figure 5, GC yield, errors in a ± 3%, in b-f ± 1% <sup>d</sup>. % conversion.

S6. Time course of photocatalytic experiments catalyzed by RFT and **1** (purple) or **2** (green).

**Figure S5.** Overlay plot of relative GC yield versus time

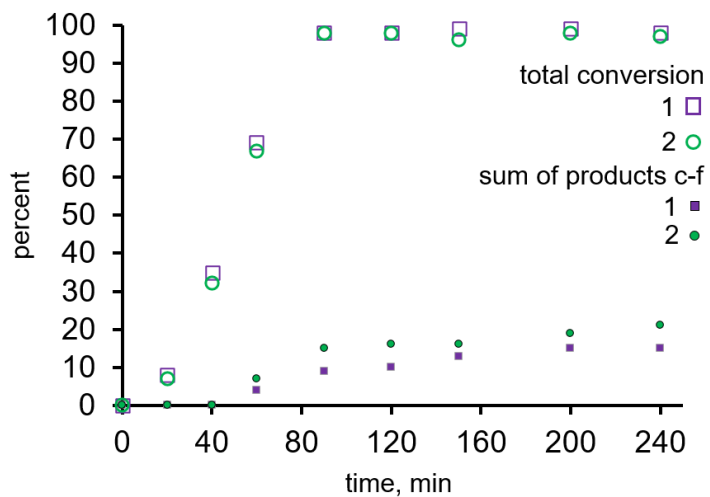

**Table S3.** GC yields for photocatalysed reactions using RFT and either **1** or **2** as catalysts

| Time (min) | Catalyst 1 |   |   |   |   |   |                  | Catalyst 2 |   |   |   |   |   |                  |
|------------|------------|---|---|---|---|---|------------------|------------|---|---|---|---|---|------------------|
|            | a          | b | c | d | e | f | Total conversion | a          | b | c | d | e | f | Total conversion |
| 0          | 0          | 0 | 0 | 0 | 0 | 0 | 0                | 0          | 0 | 0 | 0 | 0 | 0 | 0                |
| 20         | 8          | 0 | 0 | 0 | 0 | 0 | 8                | 7          | 0 | 0 | 0 | 0 | 0 | 7                |
| 40         | 35         | 0 | 0 | 0 | 0 | 0 | 35               | 32         | 0 | 0 | 0 | 0 | 0 | 32               |
| 60         | 65         | 1 | 1 | 1 | 0 | 1 | 69               | 60         | 2 | 3 | 1 | 0 | 1 | 67               |
| 90         | 89         | 2 | 2 | 2 | 1 | 2 | 98               | 83         | 4 | 5 | 3 | 1 | 2 | 98               |
| 120        | 88         | 3 | 2 | 2 | 1 | 2 | 98               | 82         | 5 | 5 | 3 | 1 | 2 | 98               |
| 150        | 86         | 4 | 4 | 2 | 1 | 2 | 99               | 80         | 4 | 5 | 4 | 1 | 2 | 96               |
| 200        | 84         | 4 | 5 | 3 | 1 | 2 | 99               | 79         | 4 | 6 | 4 | 1 | 4 | 98               |
| 240        | 83         | 4 | 5 | 3 | 1 | 2 | 98               | 76         | 4 | 6 | 5 | 1 | 5 | 97               |

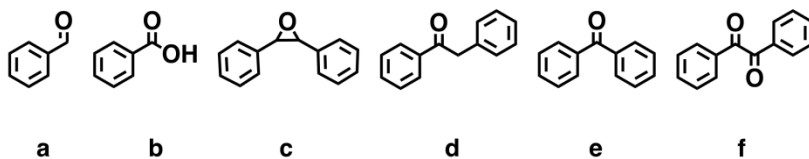

S7. Stability test for **1** and **2** under conditions of photocatalysis.

**Figure S6.**  $^1\text{H}$  NMR spectra for solutions of RFT and either (a) **1** or (b) **2** in 1 mL 10 vol%  $\text{D}_2\text{O}$  in  $\text{CD}_3\text{CN}$  before (bottom maroon spectrum) and after (top aqua spectrum) irradiation at 450 nm 90 min.

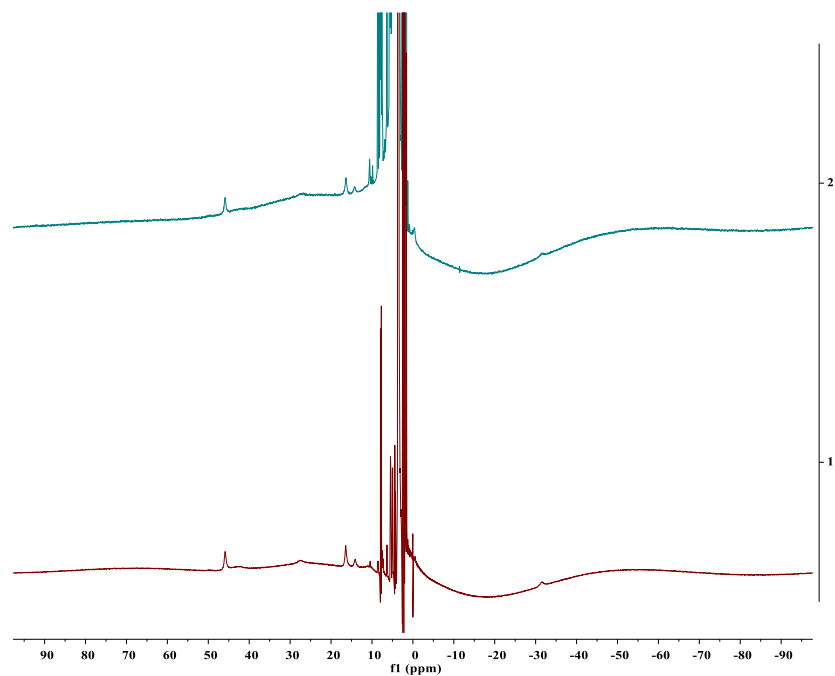

(a)

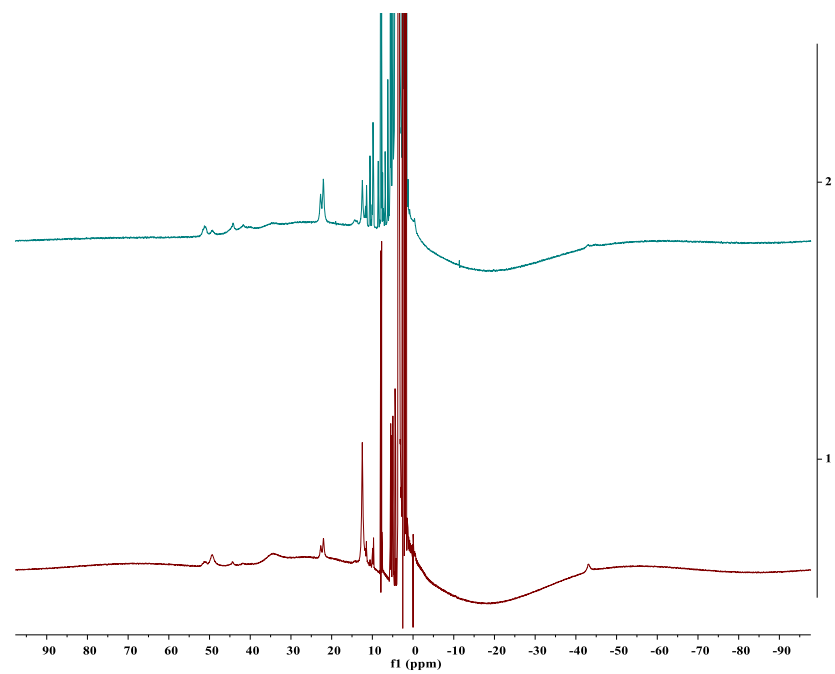

(b)
